# Supplementary material for: Controllable synthesis of graphene oxide–silver (gold) nanocomposites and their size-dependencies
Source: Royal Society of Chemistry journal article supplement (doi:10.1039/c6ra11291a), 2016-01-01
Supplement: c6ra11291a1.pdf [file c6ra11291a1.pdf]

## Controllable synthesis of graphene oxide–silver (gold) nanocomposites and their size-dependences

Xiaoqi Fu\*, Pengpeng Kuang, Shuang Wang, Guolin Zhang and Hengbo Yin

School of Chemistry and Chemical Engineering, Jiangsu University, Zhenjiang 212013, China

\* Corresponding author Tel. and Fax: +86 511 88791800

Corresponding Email: xfu@ujs.edu.cn

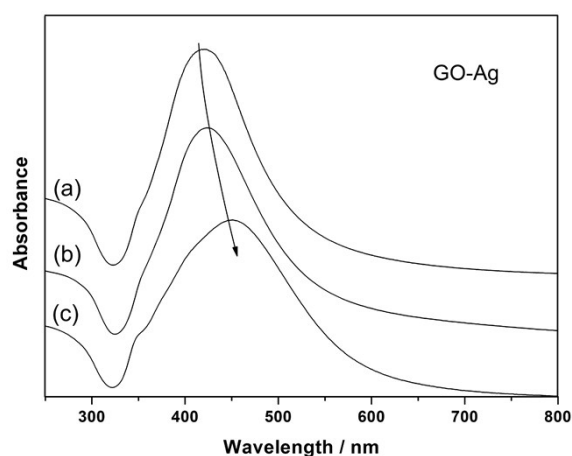

**Fig. S1** UV-Vis absorption spectra of Ag nanoparticles in different sizes: (a) Ag-1; (b) Ag-2; (c) Ag-3. The absorption peak of surface plasmon resonances of Ag nanoparticles shows a red-shift as the size of Ag nanoparticles increase.

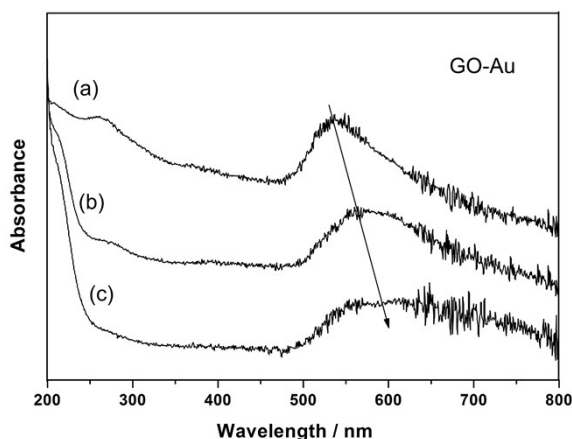

**Fig. S2** UV-Vis absorption spectra of Au nanoparticles in different sizes: (a) Au-1; (b) Au-2; (c) Au-3. The absorption peak of surface plasmon resonances of Au nanoparticles shows a red-shift as the size of Au nanoparticles increase.

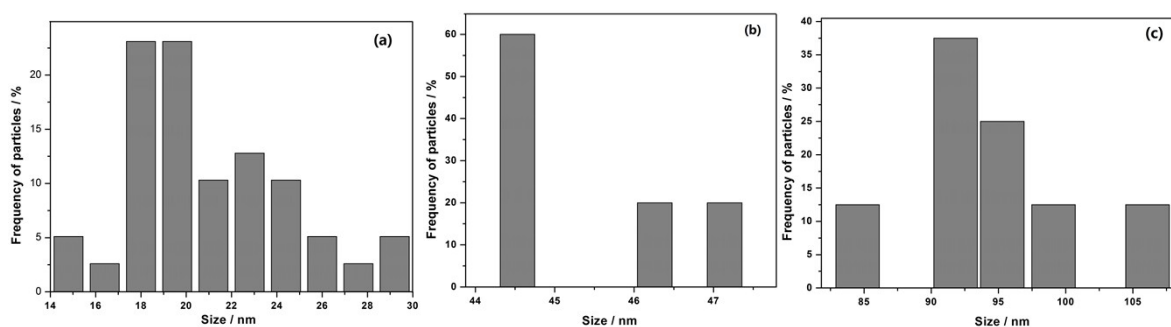

**Fig. S3** The size distribution of (a) Ag-1 (*ca.* 21.0 nm), (b) Ag-2 (*ca.* 45.5 nm), (c) Ag-3 (*ca.* 94.5 nm) samples was calculated from the TEM images.

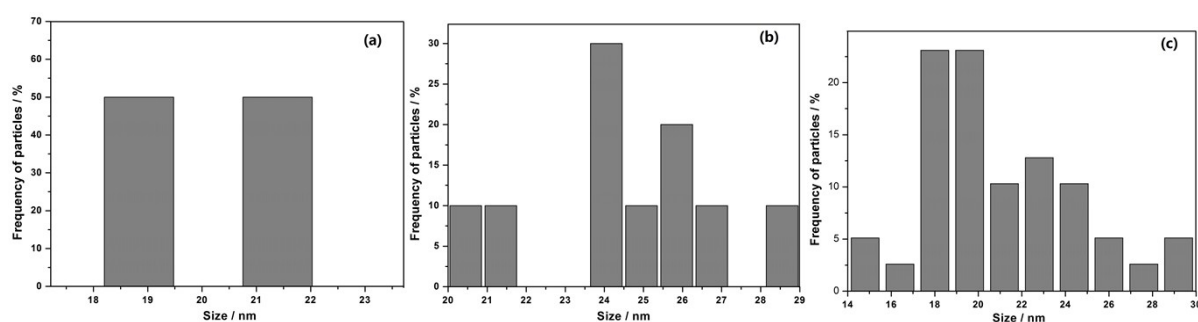

**Fig. S4** The size distribution of (a) Au-1 (*ca.* 20.2 nm), (b) Au-2 (*ca.* 24.7 nm), (c) Au-3 (*ca.* 59.4 nm) samples was calculated from the TEM images.

**Table SI** The amount of metal loaded per gram of GO for GO–Ag and GO–Au samples

|         | The amount of metal loaded per gram of GO |                                      |
|---------|-------------------------------------------|--------------------------------------|
|         | fresh sample                              | after sonication in water for 10 min |
| GO–Ag-1 | 0.103 g                                   | 0.102 g                              |
| GO–Ag-2 | 0.104 g                                   | 0.103 g                              |
| GO–Ag-3 | 0.101 g                                   | 0.100 g                              |
|         | fresh sample                              | recycled sample                      |
| GO–Au-1 | 0.047 g                                   | 0.046 g                              |
| GO–Au-2 | 0.047 g                                   | 0.045 g                              |
| GO–Au-3 | 0.044 g                                   | 0.043 g                              |
